# Supplementary material for: Neurophysiological correlates of holistic face processing in adolescents with and without autism spectrum disorder
Source: PubMed Central journal article supplement (PMC6118009; doi:10.1186/s11689-018-9244-y), 2018-08-30

*Geodesic Sensor Net – 128 Channel V 2.0-*

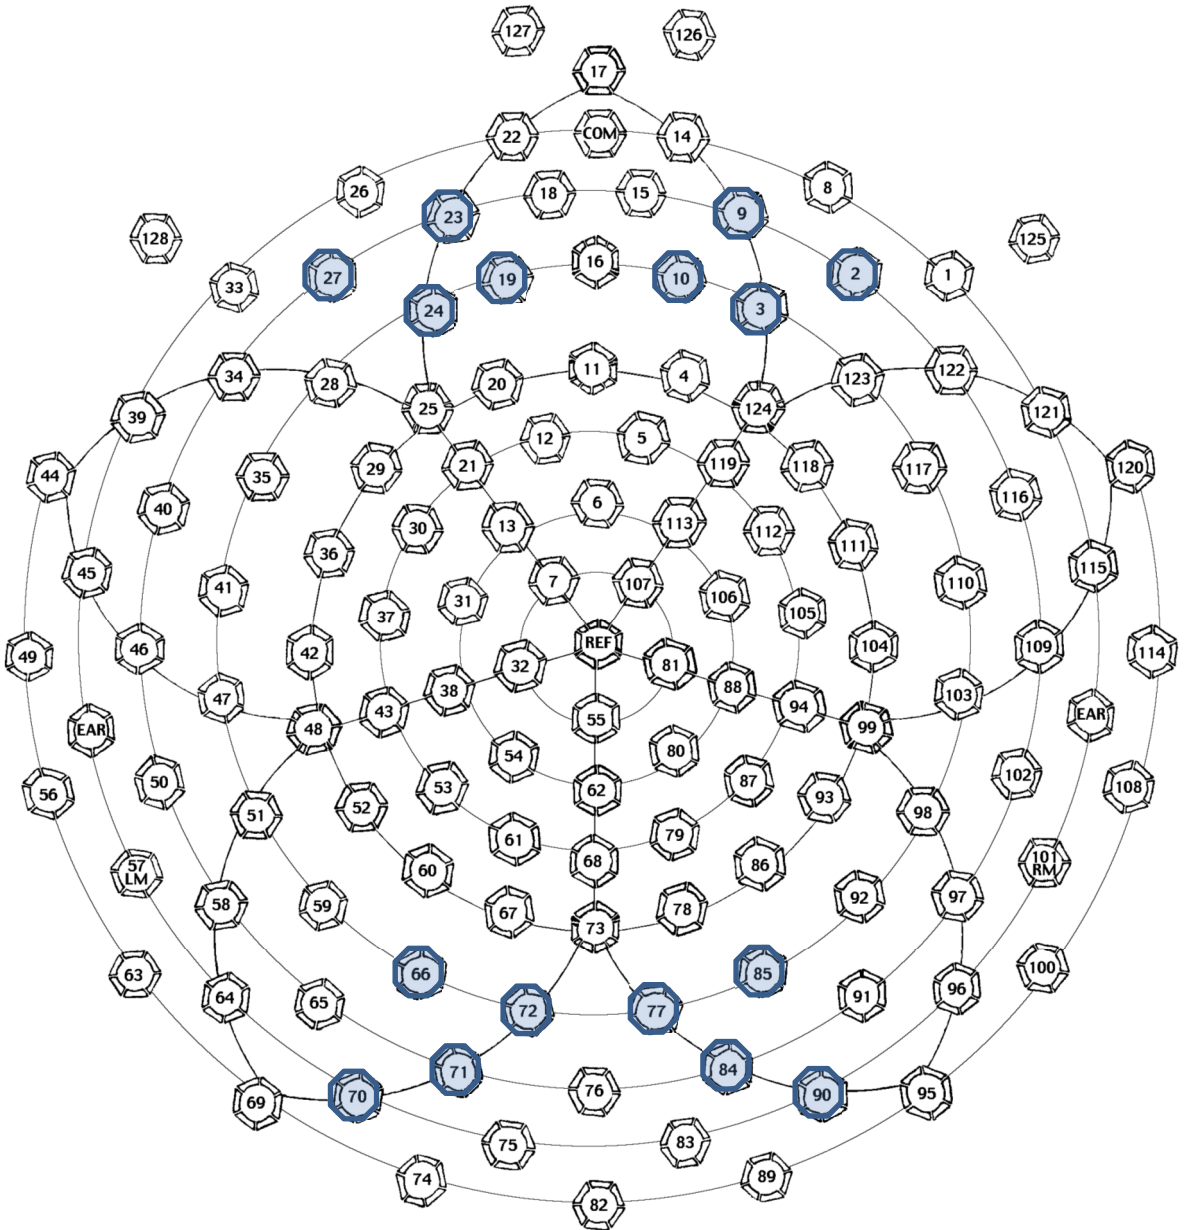

Supplement: 11689_2018_9244_MOESM1_ESM.pdf [file 11689_2018_9244_MOESM1_ESM.pdf]
